# Supplementary material for: A Role of Microtubules in Oligodendrocyte Differentiation
Source: PubMed Central journal article supplement (PMC7037135; doi:10.3390/ijms21031062), 2020-02-05
Supplement: ijms-21-01062-s001.pdf [file ijms-21-01062-s001.pdf]

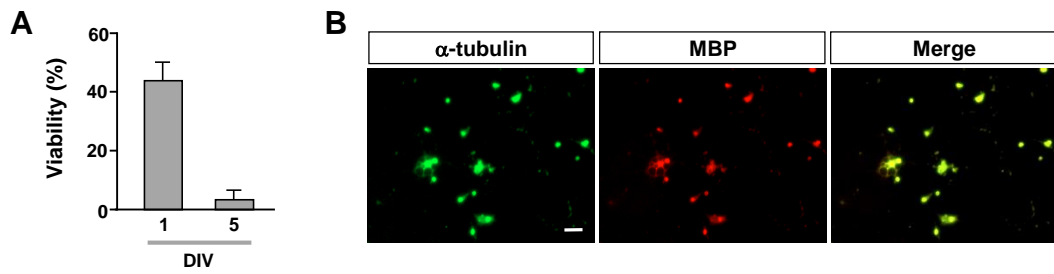

**Figure S1.** Viability and differentiation of mouse OPCs following a protocol for isolating and differentiating rat OPCs. **(A)** Cell viability of differentiating oligodendrocytes at DIV 1 and 5. Graph shows mean  $\pm$  SEM. N = 5. **(B)** Representative images of oligodendrocytes at DIV 5 stained with anti- $\alpha$ -tubulin and anti-MBP antibodies. Scale bar, 25  $\mu$ m.
